# Supplementary material for: A Penalty Branch-and-Bound Method for Mixed Binary Linear Complementarity Problems
Source: Atypon-hosted journal article supplement (doi:10.1287/ijoc.2022.1216), 2022-08-23
Supplement: ijoc.2022.1216.sm4.pdf [file ijoc.2022.1216.sm4.pdf]

## Supplementary material: Warmstart Test

**Table 1** Aggregated node counts and running times for the warmstart test without any warmstart

| $n$ | Avg.          | Med.          | Min.        | Max.          | $Q(0.25)$    | $Q(0.75)$     | GSM           | Perc.      |
|-----|---------------|---------------|-------------|---------------|--------------|---------------|---------------|------------|
| 50  | <b>13.9</b>   | <b>8.0</b>    | <b>3.0</b>  | <b>37.0</b>   | <b>5.0</b>   | <b>21.0</b>   | <b>13.3</b>   | <b>100</b> |
| 100 | <b>16.1</b>   | <b>10.0</b>   | <b>3.0</b>  | <b>73.0</b>   | <b>7.0</b>   | <b>21.0</b>   | <b>15.3</b>   | <b>100</b> |
| 150 | 35.6          | <b>24.0</b>   | <b>7.0</b>  | <b>139.0</b>  | 13.5         | <b>42.5</b>   | 32.6          | <b>100</b> |
| 200 | <b>59.5</b>   | <b>43.0</b>   | <b>15.0</b> | <b>235.0</b>  | <b>31.0</b>  | <b>82.5</b>   | 54.9          | <b>100</b> |
| 250 | <b>112.3</b>  | <b>96.0</b>   | <b>5.0</b>  | <b>353.0</b>  | <b>67.5</b>  | <b>131.0</b>  | <b>97.6</b>   | <b>100</b> |
| 300 | <b>193.3</b>  | <b>141.0</b>  | <b>15.0</b> | <b>741.0</b>  | <b>95.0</b>  | <b>254.5</b>  | 161.7         | <b>100</b> |
| 350 | 356.3         | <b>215.0</b>  | <b>7.0</b>  | 1119.0        | <b>79.0</b>  | <b>679.0</b>  | 251.1         | <b>87</b>  |
| 400 | 418.3         | <b>279.0</b>  | <b>47.0</b> | <b>1245.0</b> | <b>81.0</b>  | <b>719.0</b>  | 301.1         | 70         |
| 450 | 314.7         | <b>345.0</b>  | 51.0        | <b>647.0</b>  | <b>126.5</b> | <b>473.5</b>  | 263.7         | 47         |
| 500 | 478.6         | <b>543.0</b>  | 71.0        | <b>1043.0</b> | <b>189.0</b> | <b>547.0</b>  | 372.3         | 23         |
| 50  | <b>0.3</b>    | <b>0.3</b>    | 0.2         | 1.2           | <b>0.2</b>   | <b>0.3</b>    | <b>0.3</b>    | <b>100</b> |
| 100 | 4.5           | 2.4           | 1.1         | 20.6          | 1.9          | 5.4           | 4.0           | <b>100</b> |
| 150 | 26.8          | 19.3          | 6.5         | 111.9         | 10.0         | 31.4          | 21.5          | <b>100</b> |
| 200 | 90.4          | 62.8          | 28.7        | 295.1         | 50.6         | 116.2         | 77.5          | <b>100</b> |
| 250 | 241.2         | 209.7         | 32.3        | 762.3         | 161.0        | 309.2         | 190.7         | <b>100</b> |
| 300 | 533.8         | 451.4         | 112.5       | 1764.6        | 260.8        | 655.1         | 429.0         | <b>100</b> |
| 350 | 1256.3        | 787.4         | 105.2       | 3360.6        | 369.7        | 2311.8        | 826.9         | <b>87</b>  |
| 400 | 1550.7        | 1401.0        | 300.9       | 3522.8        | <b>396.9</b> | 2497.7        | 1125.9        | 70         |
| 450 | 1460.0        | <b>1505.9</b> | 345.3       | 2608.6        | 751.1        | 2112.5        | 1223.4        | 47         |
| 500 | <b>1995.4</b> | 2206.2        | 584.4       | <b>3375.5</b> | 1055.1       | <b>2755.9</b> | <b>1663.8</b> | 23         |

**Table 2** Aggregated node counts and running times for the warmstart test using PStart/DStart

| $n$ | Avg.         | Med.          | Min.        | Max.          | $Q(0.25)$     | $Q(0.75)$    | GSM          | Perc.      |
|-----|--------------|---------------|-------------|---------------|---------------|--------------|--------------|------------|
| 50  | <b>13.9</b>  | <b>8.0</b>    | <b>3.0</b>  | <b>37.0</b>   | <b>5.0</b>    | <b>21.0</b>  | <b>13.3</b>  | <b>100</b> |
| 100 | <b>16.1</b>  | <b>10.0</b>   | <b>3.0</b>  | <b>73.0</b>   | <b>7.0</b>    | <b>21.0</b>  | <b>15.3</b>  | <b>100</b> |
| 150 | <b>35.3</b>  | <b>24.0</b>   | <b>7.0</b>  | <b>139.0</b>  | <b>12.0</b>   | <b>42.5</b>  | <b>32.3</b>  | <b>100</b> |
| 200 | <b>59.5</b>  | <b>43.0</b>   | <b>15.0</b> | <b>235.0</b>  | <b>31.0</b>   | <b>82.5</b>  | <b>54.8</b>  | <b>100</b> |
| 250 | <b>112.2</b> | <b>96.0</b>   | <b>5.0</b>  | <b>353.0</b>  | <b>67.5</b>   | <b>131.0</b> | <b>97.6</b>  | <b>100</b> |
| 300 | <b>193.3</b> | <b>141.0</b>  | <b>15.0</b> | <b>741.0</b>  | <b>95.0</b>   | <b>254.5</b> | <b>161.6</b> | <b>100</b> |
| 350 | <b>355.4</b> | <b>215.0</b>  | <b>7.0</b>  | <b>1107.0</b> | <b>79.0</b>   | <b>679.0</b> | <b>249.9</b> | 83         |
| 400 | <b>417.6</b> | <b>279.0</b>  | <b>47.0</b> | <b>1245.0</b> | <b>81.0</b>   | <b>719.0</b> | <b>300.3</b> | 70         |
| 450 | <b>312.4</b> | <b>345.0</b>  | <b>41.0</b> | <b>649.0</b>  | <b>126.5</b>  | <b>473.5</b> | <b>258.6</b> | 47         |
| 500 | <b>476.6</b> | <b>543.0</b>  | <b>61.0</b> | <b>1043.0</b> | <b>189.0</b>  | <b>547.0</b> | <b>366.6</b> | 17         |
| 50  | <b>0.3</b>   | <b>0.3</b>    | <b>0.1</b>  | 1.2           | <b>0.2</b>    | <b>0.3</b>   | <b>0.3</b>   | <b>100</b> |
| 100 | 4.0          | 2.4           | 1.3         | 15.7          | 1.8           | 4.5          | 3.6          | <b>100</b> |
| 150 | 25.1         | 17.9          | 4.5         | 84.9          | <b>9.3</b>    | <b>27.7</b>  | 20.1         | <b>100</b> |
| 200 | 86.2         | 63.2          | 25.9        | 296.0         | 48.5          | 116.0        | 73.5         | <b>100</b> |
| 250 | 245.0        | 207.1         | <b>26.5</b> | 754.8         | 145.4         | 309.0        | 189.6        | <b>100</b> |
| 300 | 549.8        | 450.0         | 103.4       | 1586.1        | 299.5         | 745.0        | 442.9        | <b>100</b> |
| 350 | 1324.4       | <b>708.9</b>  | 113.3       | 3361.2        | 383.7         | 2404.4       | 857.4        | 83         |
| 400 | 1544.5       | <b>1039.5</b> | 292.4       | 3201.7        | 460.1         | 2421.4       | 1136.5       | 70         |
| 450 | 1500.2       | 1591.4        | 406.3       | 2919.3        | 719.5         | 2102.1       | 1262.7       | 47         |
| 500 | 2119.3       | <b>2194.8</b> | 838.8       | 3386.6        | <b>1015.6</b> | 3160.8       | 1822.6       | 17         |
